# Supplementary material
Source: MDPI journal article supplement (https://www.mdpi.com/2304-6767/10/12/231)
Supplement: s1 [file s1]

**Table S1.** Family, social, and personal history of participants according to BMI [n (%) or median (first, third quartile)].

|                               | Participants (N=123)    |                      |                   | <i>p</i> -value |
|-------------------------------|-------------------------|----------------------|-------------------|-----------------|
|                               | Normal weight<br>(n=50) | Overweight<br>(n=28) | Obesity<br>(n=45) |                 |
| Education                     |                         |                      |                   |                 |
| Less than a bachelor's degree | 10 (20.0)               | 8 (28.6)             | 15 (33.3)         | 0.333           |
| Bachelor's degree or higher   | 40 (80.0)               | 20 (71.4)            | 30 (66.7)         |                 |
| Living                        |                         |                      |                   |                 |
| Alone                         | 5 (10.0)                | 5 (17.9)             | 5 (11.1)          | 0.573           |
| Family                        | 45 (90.0)               | 23 (82.1)            | 40 (88.9)         |                 |
| Health financial status       |                         |                      |                   |                 |
| Independent                   | 16 (32.0)               | 8 (28.6)             | 6 (13.3)          | 0.233           |
| Dependent                     | 8 (16.0)                | 7 (25.0)             | 11 (24.4)         |                 |
| Welfare                       | 26 (52.0)               | 13 (46.4)            | 28 (62.3)         |                 |
| Dental financial status       |                         |                      |                   |                 |
| Independent                   | 21 (42.0)               | 15 (53.6)            | 18 (40.0)         | 0.493           |
| Welfare                       | 29 (58.0)               | 13 (46.4)            | 27 (60.0)         |                 |
| Travel                        |                         |                      |                   |                 |
| Independent                   | 50 (100.0)              | 26 (92.9)            | 43 (95.6)         | -               |
| Dependent                     | 0 (0.0)                 | 2 (7.1)              | 2 (4.44)          |                 |
| Exercise                      |                         |                      |                   |                 |
| Less than 3 times/week        | 23 (46.0)               | 19 (67.9)            | 28 (62.2)         | 0.116           |
| Three times or more/per week  | 27 (54.0)               | 9 (32.1)             | 17 (37.8)         |                 |
| Alcohol consumption           |                         |                      |                   |                 |
| Current                       | 16 (32.0)               | 9 (32.1)             | 20 (44.4)         | 0.553           |
| Former                        | 10 (20.0)               | 4 (14.3)             | 9 (20.0)          |                 |
| Never                         | 24 (48.0)               | 15 (53.6)            | 16 (35.6)         |                 |
| Smoking                       |                         |                      |                   |                 |
| Current and former            | 6 (12.0)                | 9 (32.1)             | 14 (31.1)         | 0.056           |
| Never                         | 44 (88.0)               | 19 (67.9)            | 31 (68.9)         |                 |
| Sleeping hours                | 6.8 (6.0, 7.5)          | 6.5 (6.0, 7.0)       | 6.0 (5.0, 7.0)    | 0.101           |
