# Supplementary material
Source: MDPI journal article supplement (https://www.mdpi.com/2304-6767/10/12/231)
Supplement: s1 [file s1]

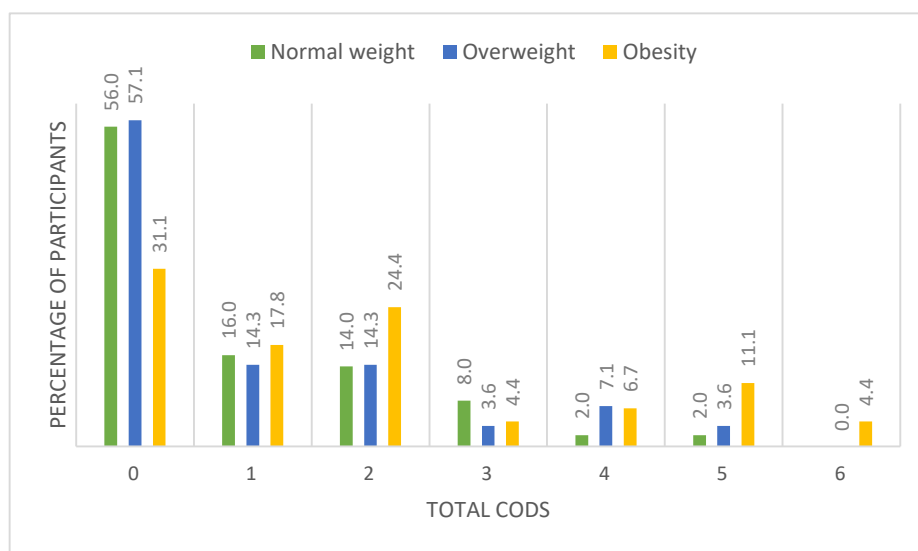

(a)

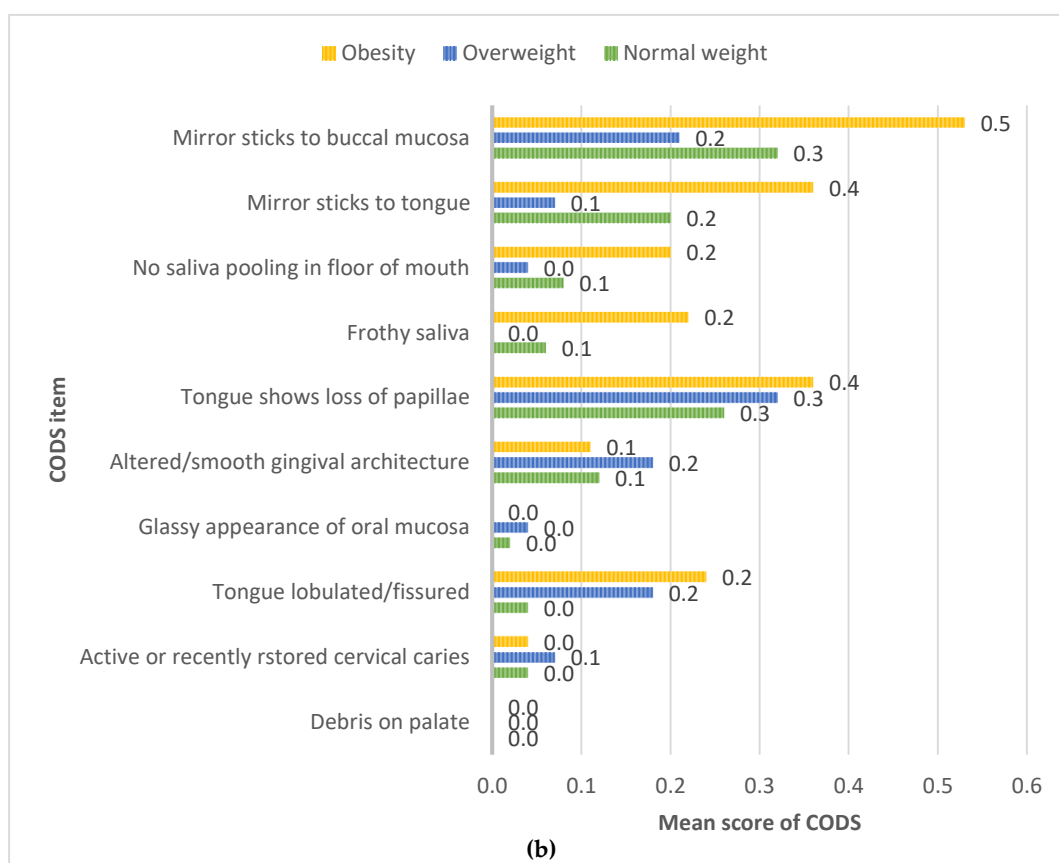

(b)

**Figure S2. (a)** Percentage of participants according to the total clinical oral dryness score (CODS); **(b)** mean CODS according to each item.
