# Supplementary material
Source: MDPI journal article supplement (https://www.mdpi.com/2304-6767/10/12/231)
Supplement: s1 [file s1]

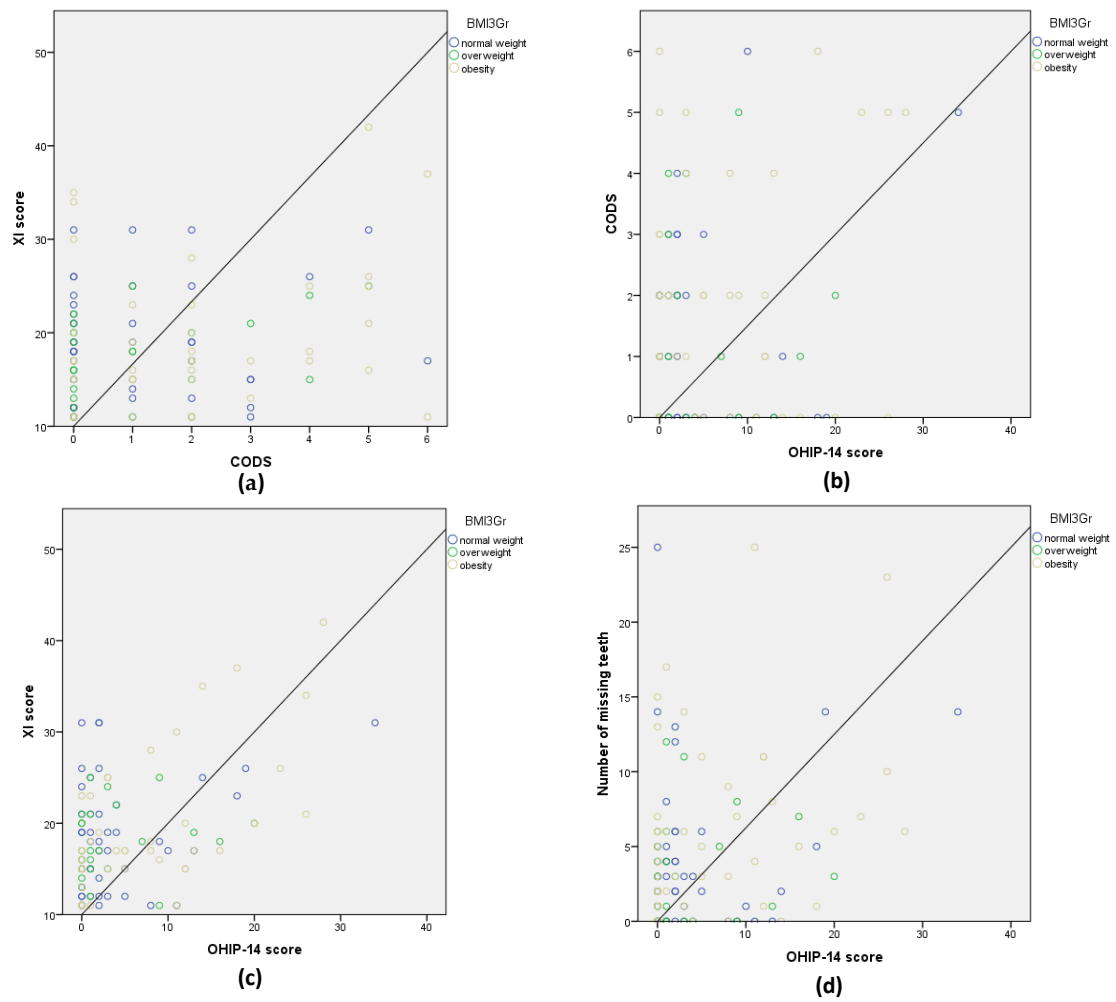

**Figure S1.** (a) Correlation of Xerostomia Inventory-11 (XI-11) scores with the clinical oral dryness score (CODS); (b) the severity of the oral health impact profile (OHIP-14) with CODS; (c) the severity of the OHIP-14 with XI-11 score; (d) the severity of the OHIP-14 with number of missing teeth; adjusted for body mass index (BMI).
