# Supplementary material
Source: MDPI journal article supplement (https://www.mdpi.com/2304-6767/10/12/231)
Supplement: s1 [file s1]

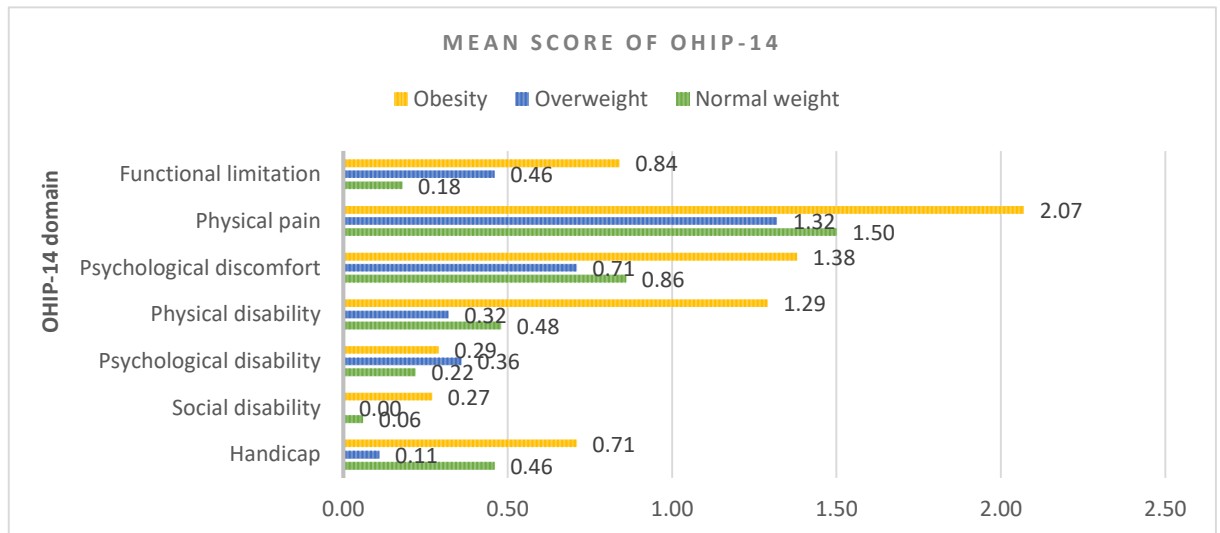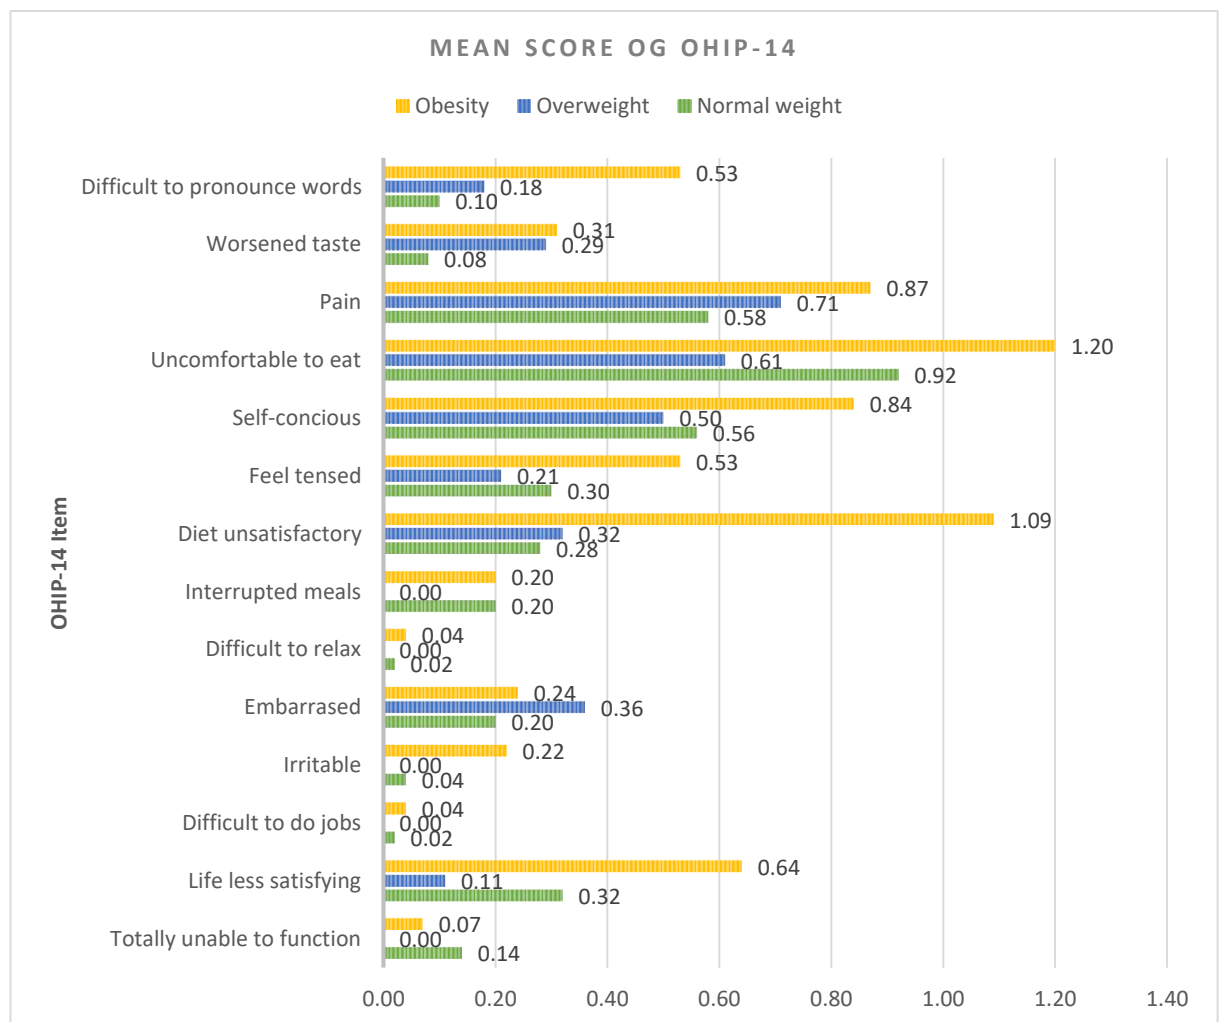

**Figure S5. (a)** The average severity score of the oral health impact profile (OHIP-14) according to 7 domains; **(b)** The average severity score of the OHIP-14 according to 14 items.
