# Supplementary material
Source: MDPI journal article supplement (https://www.mdpi.com/2304-6767/10/12/231)
Supplement: s1 [file s1]

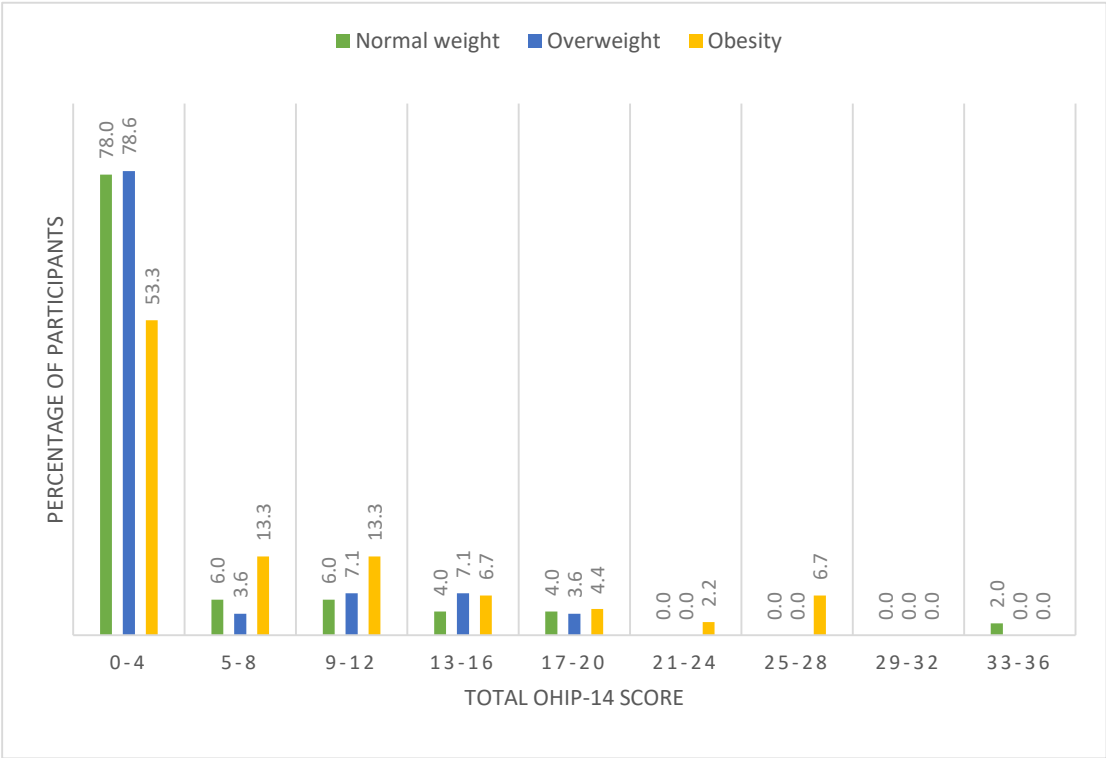

**Figure S4.** Percentage of participants according to the oral health impact profile (OHIP-14) total score.
