# Supplementary material
Source: MDPI journal article supplement (https://www.mdpi.com/2304-6767/10/12/231)
Supplement: s1 [file s1]

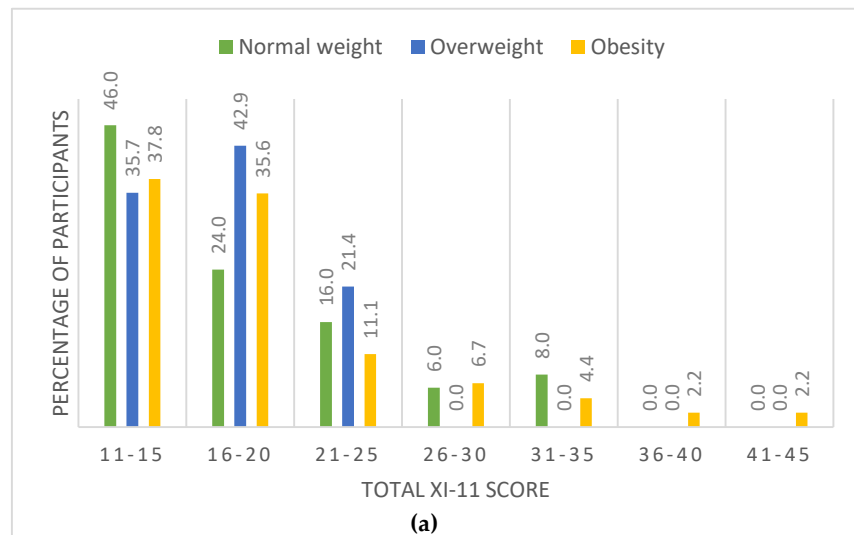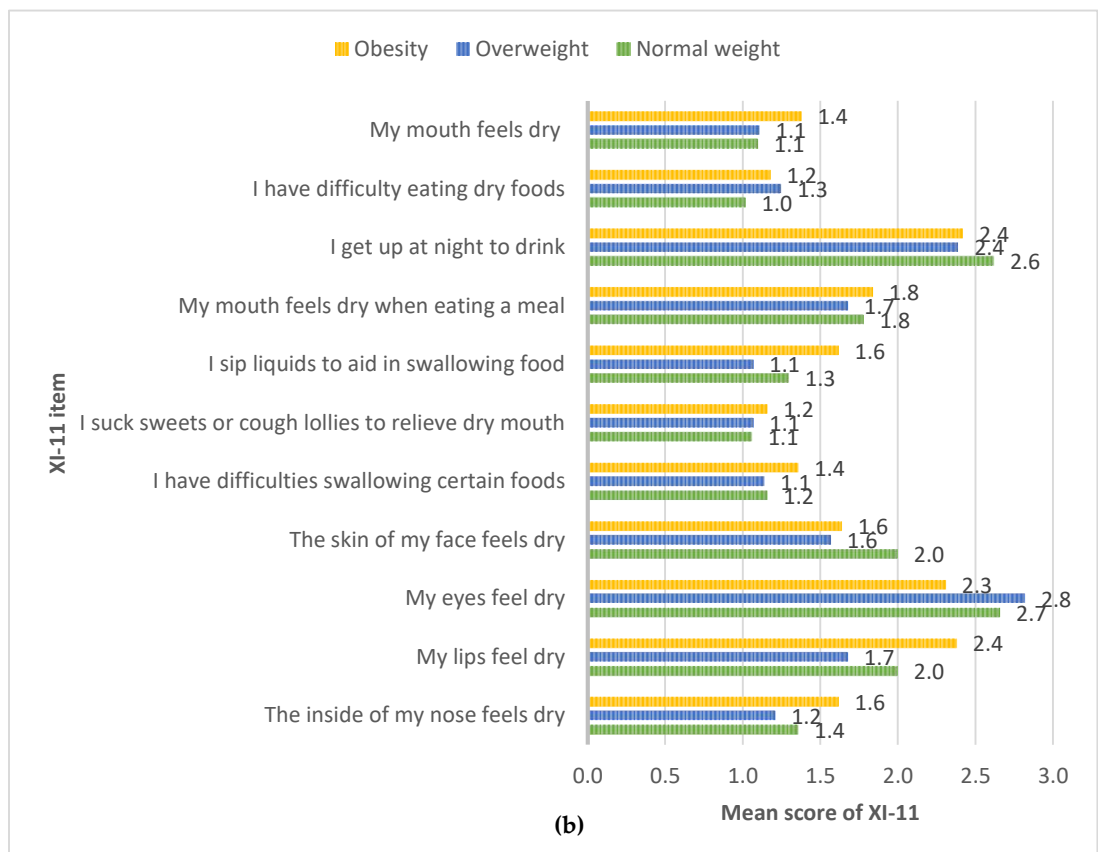

**Figure S3. (a)** Percentage of participants according to total Xerostomia Inventory-11 (XI-11) score; **(b)** mean XI-11 score according to each item.
